# Supplementary material
Source: publisher figshare collection journal article supplement (https://acs.figshare.com/ndownloader/files/5940795)
Supplement: Supplementary file 1 [file 5940795]

# Supplementary information for

## Real-time monitoring of Ligand binding to G-Quadruplex and duplex DNA by whispering gallery mode (WGM) sensing

*Sirirat Panich<sup>†</sup>, Mazen Haj Sleiman<sup>‡</sup>, Isobel Steer<sup>‡</sup>, Sylvain Ladame<sup>2, \*‡</sup> and Joshua B. Edel<sup>\*†</sup>*

<sup>†</sup>Department of Chemistry, Imperial College London, South Kensington Campus,  
London, SW7 2AZ.

<sup>‡</sup>Department of Bioengineering, Imperial College London, South Kensington  
Campus,  
London, SW7 2AZ.

### Corresponding Author

\* E-mail [joshua.edel@imperial.ac.uk](mailto:joshua.edel@imperial.ac.uk); [sladame@imperial.ac.uk](mailto:sladame@imperial.ac.uk)

Phone: (+44 (0)20 7594 0754)

## SI Contents

| Title                                                                                                                                                                                                                                                                                              | Page |
|----------------------------------------------------------------------------------------------------------------------------------------------------------------------------------------------------------------------------------------------------------------------------------------------------|------|
| Figure S1. General synthetic strategy for microresonator surface modification.                                                                                                                                                                                                                     | S3   |
| Figure S2. AT-IR characterization of microresonators before (a) and after (b) APTES functionalization.                                                                                                                                                                                             | S4   |
| Figure S3. WGM real time monitoring of the immobilization of prefolded c-myc G4 DNA onto a resonator using increasing DNA concentrations (0.05-1.00 $\mu\text{M}$ ).                                                                                                                               | S5   |
| Figure S4. Kinetic analysis of the interaction between CV and c-myc G4 DNA immobilized on a WGM resonator at different flow rates.                                                                                                                                                                 | S6   |
| Figure S5. Illustration of two-term polynomial fit curves onto a) CV on G4 and b) MG on Duplex.                                                                                                                                                                                                    | S7   |
| Figure S6. Plot of WGM $k_{\text{obs}}$ as a function of ligand concentration. Illustrates $K_{\text{on}}$ (gradient) and $k_{\text{off}}$ (intercept) – values listed in Table 1.                                                                                                                 | S8   |
| Figure S7. Example linear fit of $\ln(\Delta R/\Delta R_0)$ during the dissociation phase of the curve.                                                                                                                                                                                            | S9   |
| Figure S8. Normalized wavelength shifts for binding of TO to either a bare WGM resonator or to a WGM resonator functionalized with the c-myc G4 DNA.                                                                                                                                               | S10  |
| Figure S9. Fluorescent titration control experiments. Fraction bound of three fluorescent ligands with G4 and duplex DNA, in order to estimate $K_D$ at EC <sub>50</sub> .                                                                                                                         | S11  |
| Figure S10. Quadruplex/duplex DNA competition experiments. Binding of CV (a) and MB (b) to the G4 DNA was monitored in real time in the absence and in the presence of competitor double-stranded CT DNA.                                                                                          | S12  |
| Table S1. Two sets of independently calculated $k_{\text{off}}$ values. One set is deduced from the $\ln(\Delta R/\Delta R_0)$ dissociation slopes. These are presented alongside the $k_{\text{off}}$ values obtained from the intercept of the observed association constants $k_{\text{obs}}$ . | S13  |
| Table S2. Dissociation constant $K_D$ values calculated by fluorescence titration experiments.                                                                                                                                                                                                     | S14  |

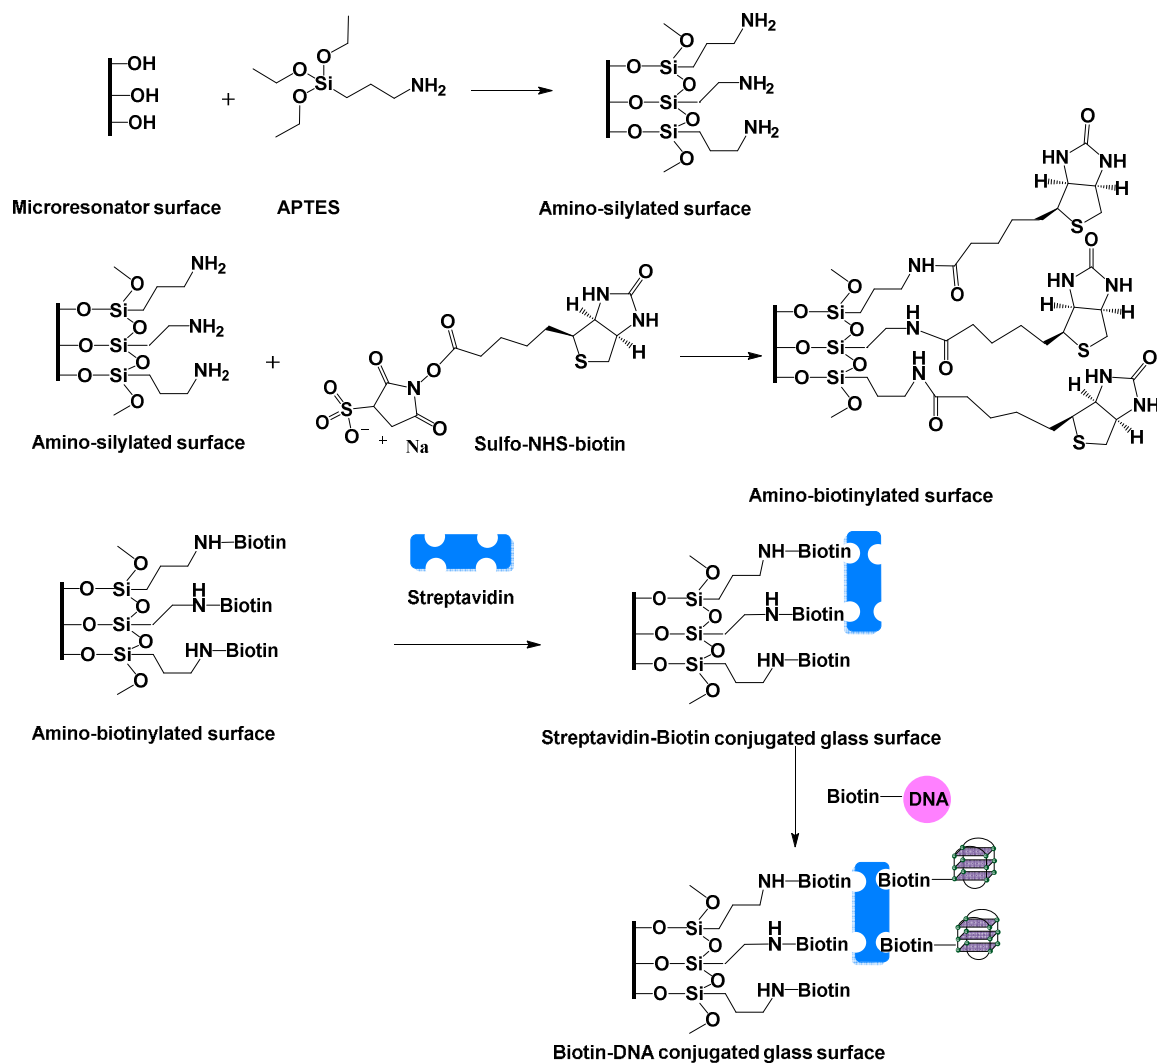

Figure S1. General synthetic strategy for microresonator surface modification.

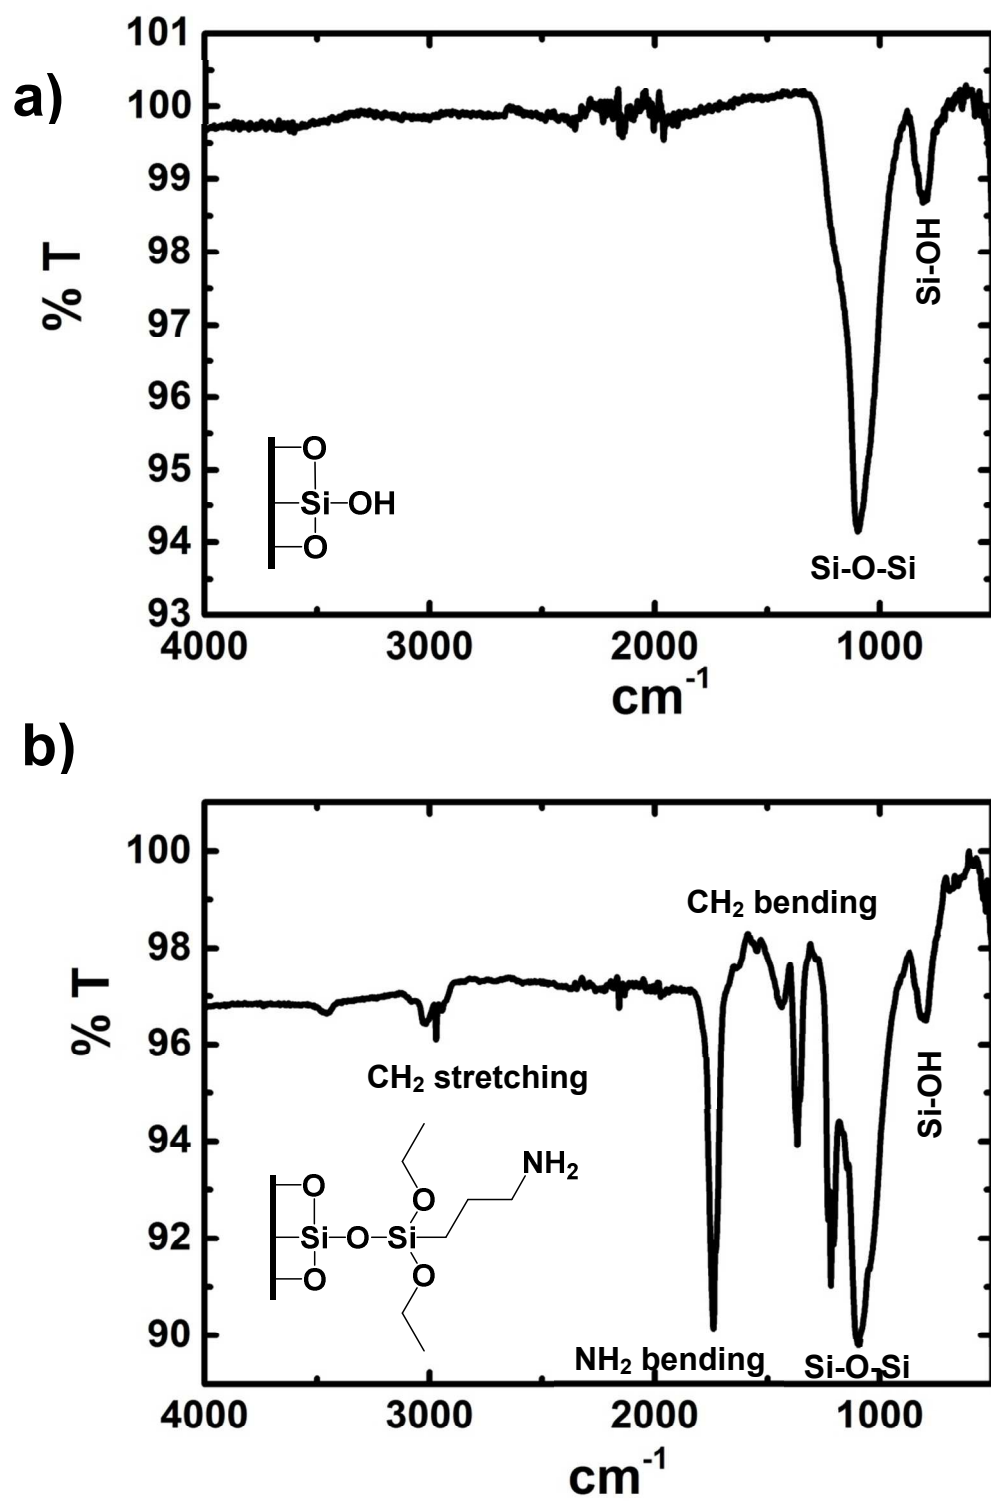

Figure S2. AT-IR characterization of microresonators before (a) and after (b) APTES functionalization

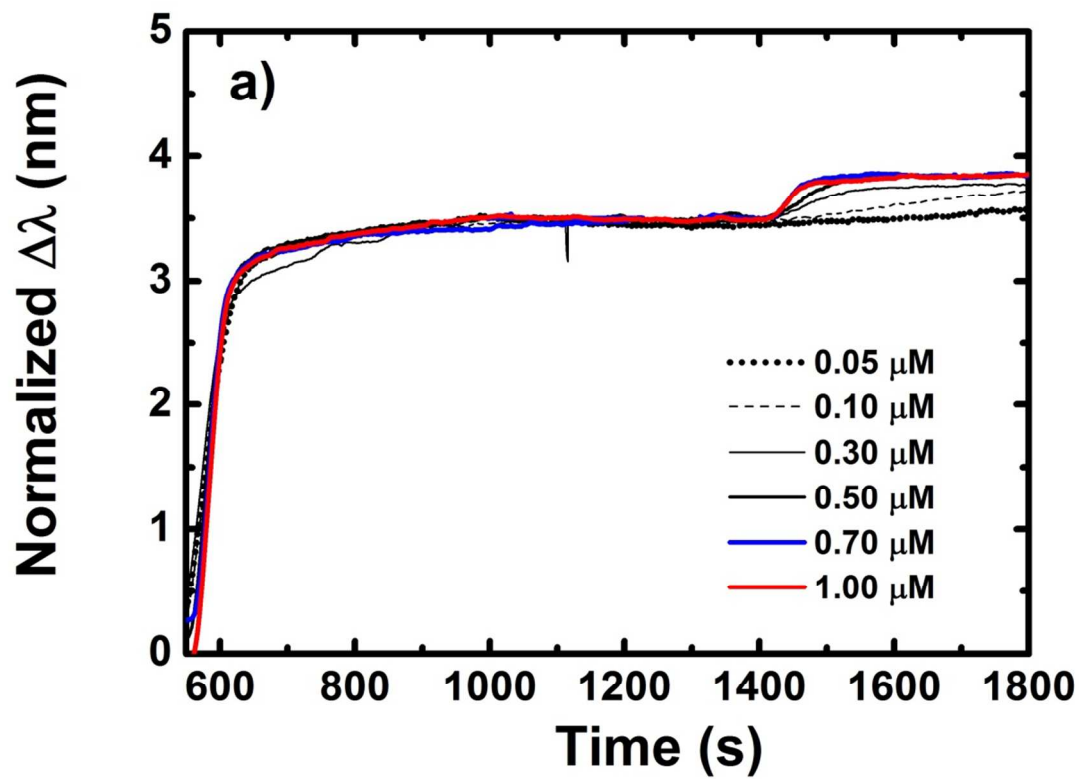

Figure S3. WGM real time monitoring of the immobilization of prefolded c-myc G4 DNA onto a resonator using increasing DNA concentrations (0.05-1.00  $\mu\text{M}$ ).

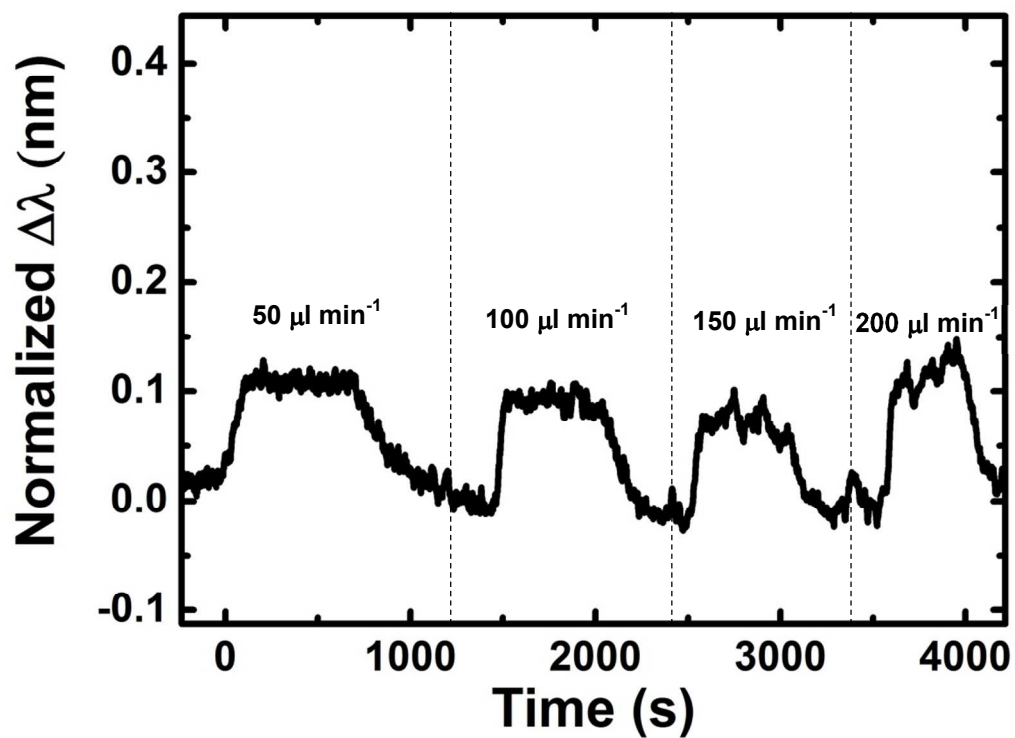

Figure S4. Kinetic analysis of the interaction between CV and c-myc G<sub>4</sub> DNA immobilized on a WGM resonator at different flow rates. CV concentration was 1.5  $\mu\text{M}$  and flow rate varied between 50-200  $\mu\text{L.min}^{-1}$ . The normalized  $\Delta\lambda$  was found to be independent from the flow rate indicating that binding is not limited by mass transport.

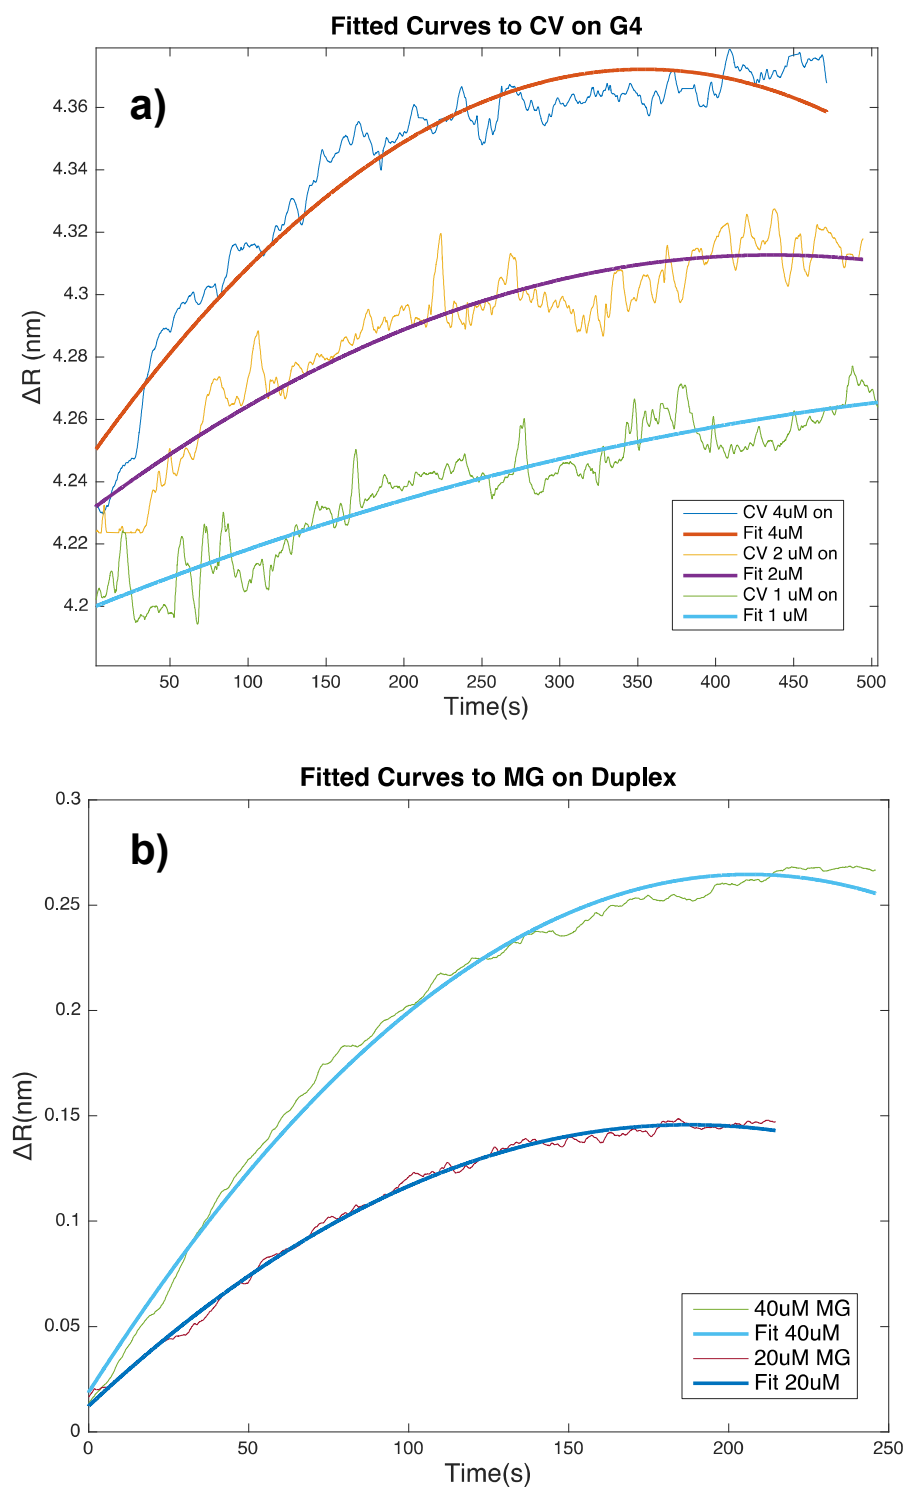

Figure S5. Illustration of two-term polynomial fit curves onto a) CV on G4 and b) MG on Duplex. Polynomial equation is  $f(x) = p_1 \cdot x^2 + p_2 \cdot x + p_3$ .  $P_1 = K_{obs}$ .

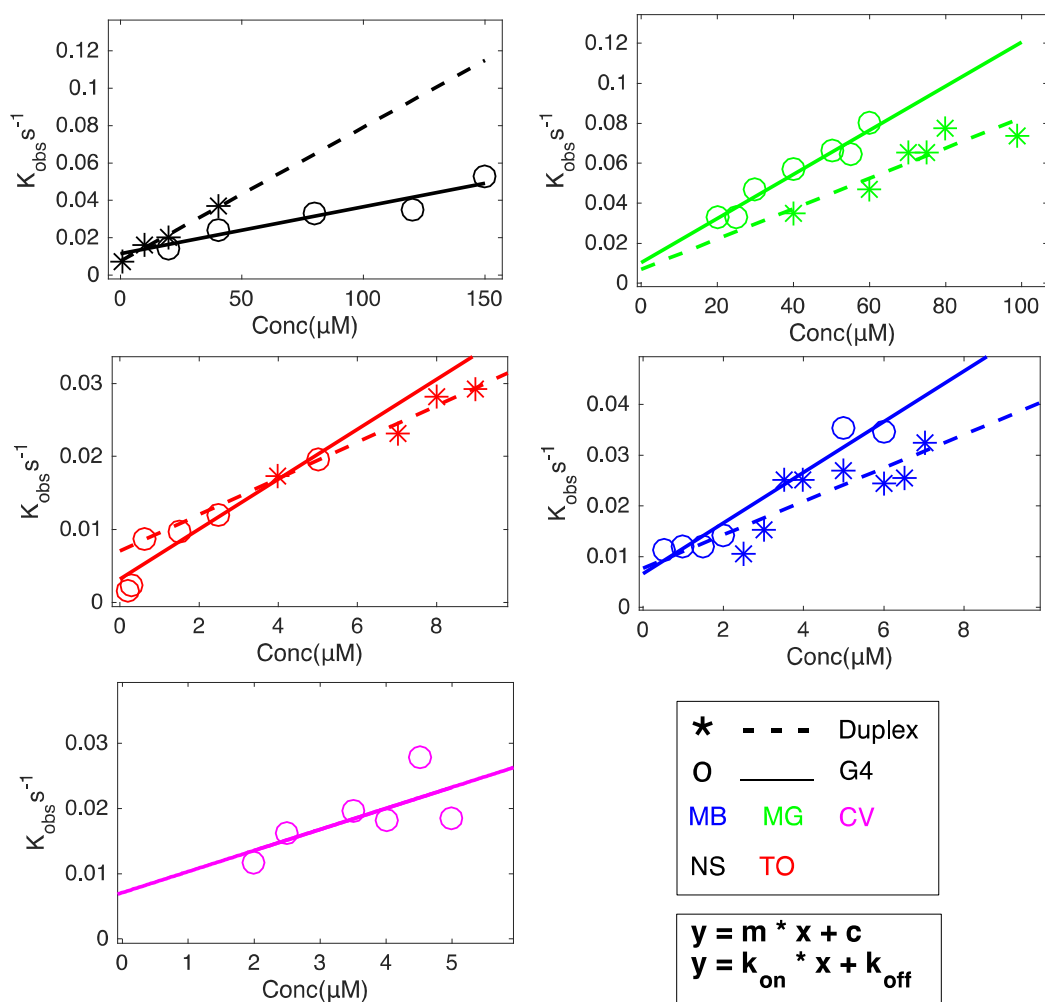

Figure S6. Plot of WGM  $k_{obs}$  as a function of ligand concentration. Illustrates  $K_{on}$  (gradient) and  $k_{off}$  (intercept) – values listed in Table 1.



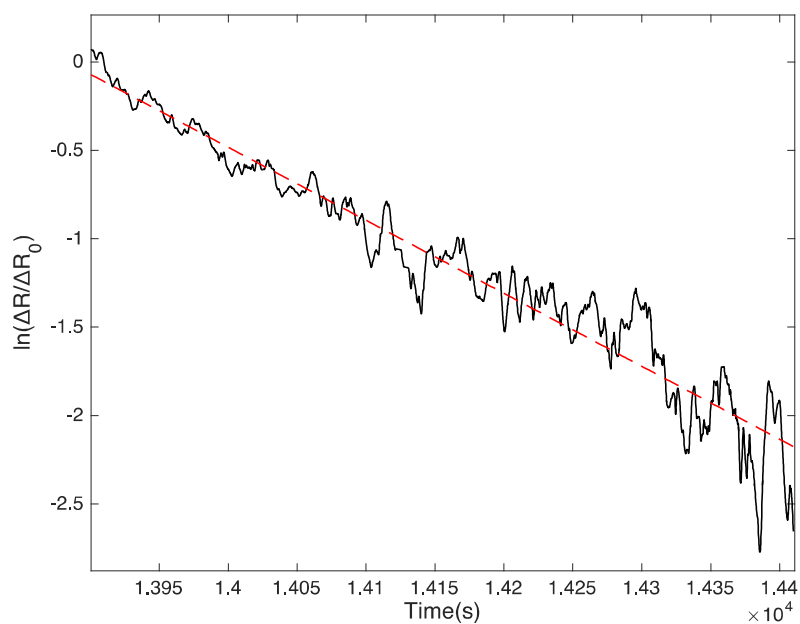

Figure S7. Linear fit of  $\ln(\Delta R/\Delta R_0)$  during the dissociation phase of the curve. 4 $\mu$ M CV dissociates from a G quadruplex-coated resonator after injection of buffer at a flow rate of 100 $\mu$ l/min.

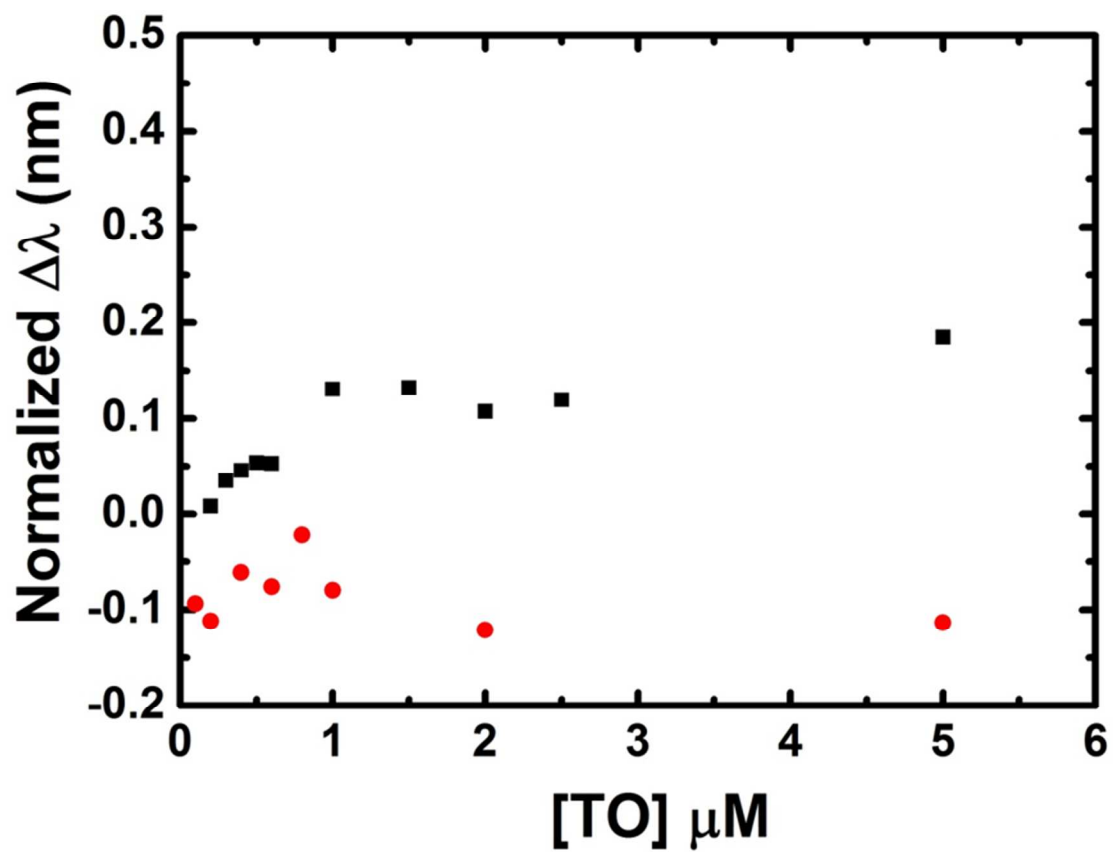

Figure S8. Normalized wavelength shifts for binding of TO to either a bare WGM resonator (red circles) or to a WGM resonator functionalized with the c-myc G4 DNA (black squares).

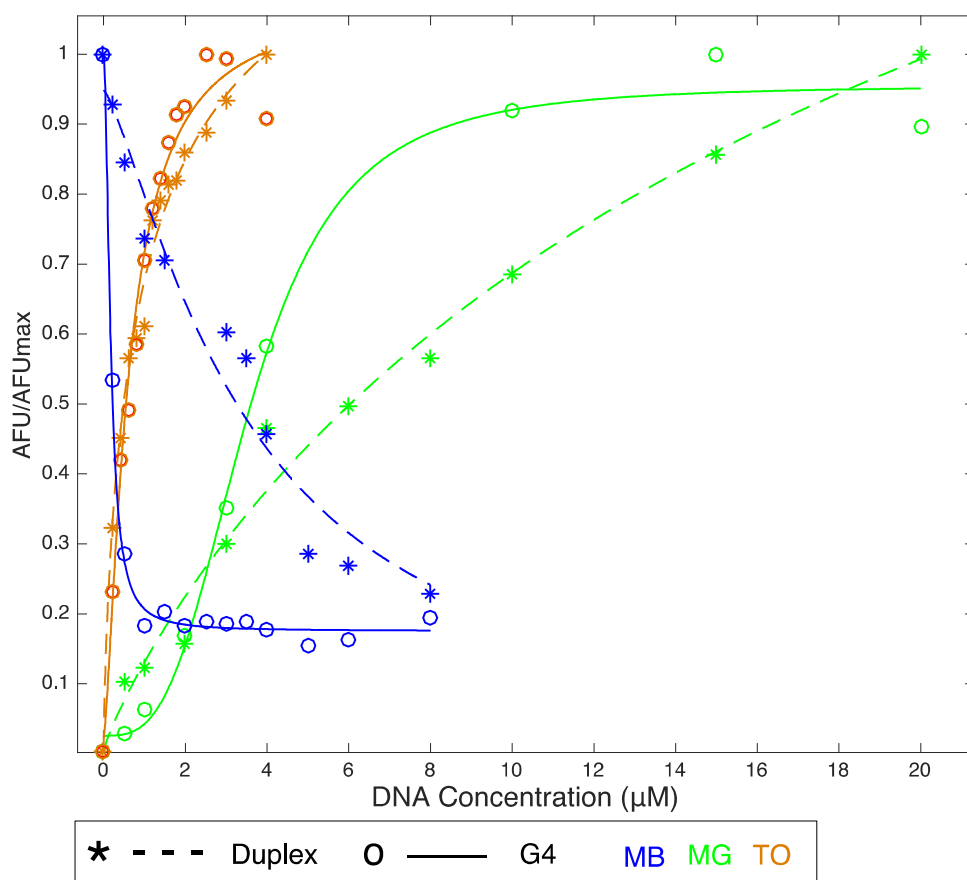

Figure S9. Fluorescent titration control experiments. Fraction bound of different ligands in AFU with G4 and duplex DNA, in order to estimate  $K_D$  at EC<sub>50</sub>. NB: MB fluorescence decreases with DNA addition.

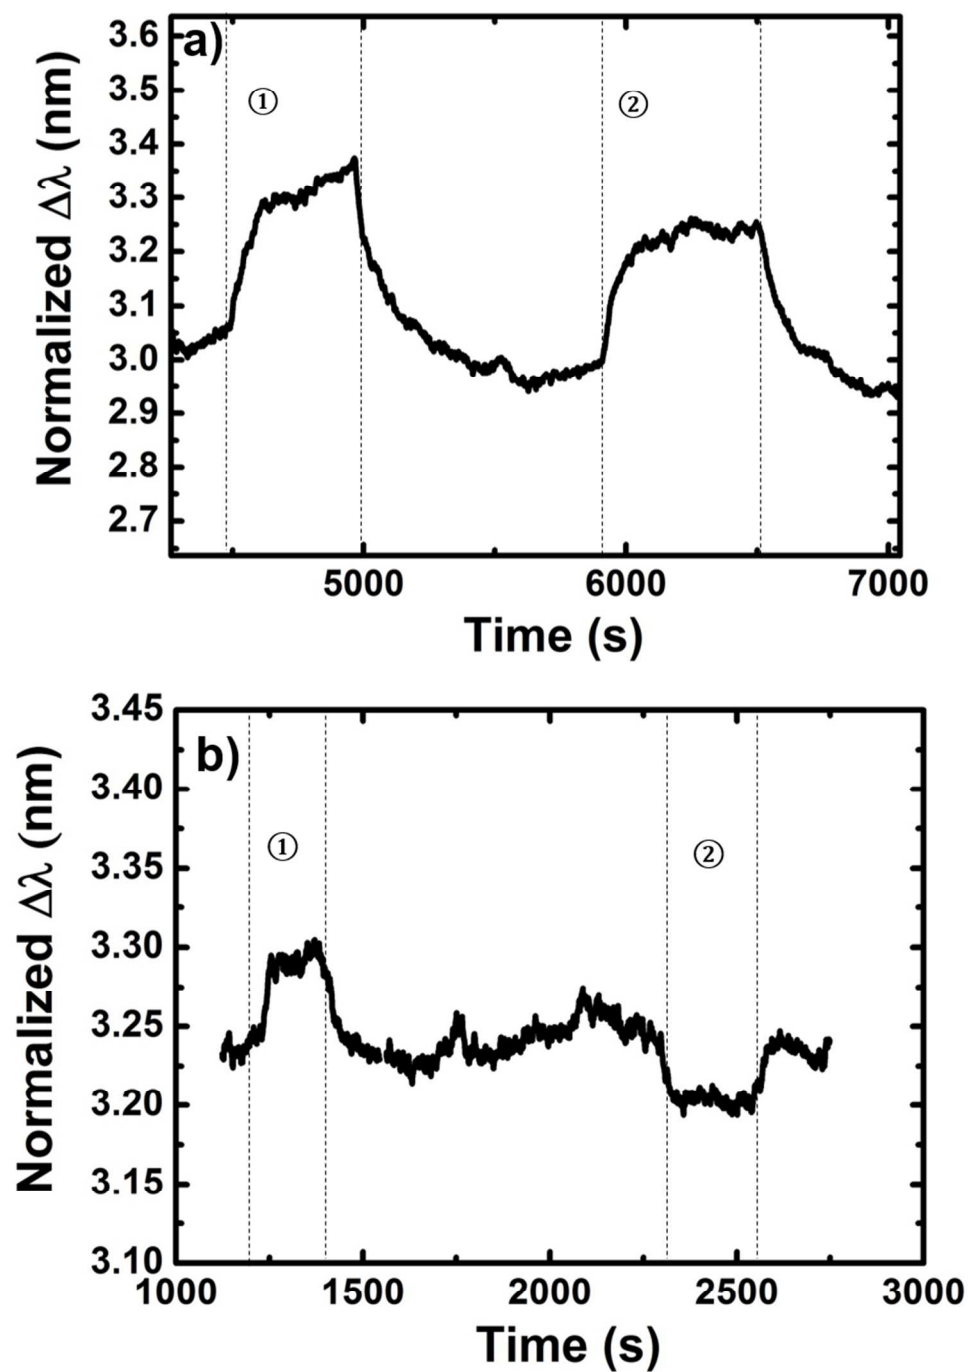

Figure S10. Quadruplex/duplex DNA competition experiments. WGM resonators were functionalized with prefolded cmc G<sub>4</sub> DNA. Binding of CV (a) and MB (b) to the G<sub>4</sub> DNA was then monitored in real time in the absence (①) and in the presence (②) of competitor double-stranded CT DNA.

| DNA<br><br>Ligand | G quadruplex                           |                                        | Duplex                                 |                                        |
|-------------------|----------------------------------------|----------------------------------------|----------------------------------------|----------------------------------------|
|                   | $K_{\text{off}}$<br>(s <sup>-1</sup> ) | $K_{\text{off}}$<br>(s <sup>-1</sup> ) | $K_{\text{off}}$<br>(s <sup>-1</sup> ) | $K_{\text{off}}$<br>(s <sup>-1</sup> ) |
|                   | Intercept                              | Log dissoc.                            | Intercept                              | Log dissoc.                            |
| CV                | 0.00710                                | 0.00597                                | *                                      | *                                      |
| MB                | 0.00980                                | 0.01315                                | 0.00897                                | 0.00710                                |
| TO                | 0.00149                                | 0.00139                                | 0.00705                                | 0.00528                                |
| MG                | 0.01031                                | 0.0173                                 | 0.01865                                | 0.00866                                |
| NS                | 0.01140                                | 0.0134                                 | 0.00754                                | ****                                   |

Table S1. Two sets of independently calculated  $k_{\text{off}}$  values. One set is deduced from the log-transformed dissociation slopes, according to the protocols of Soteropoulos et al (2011). These are presented alongside the  $k_{\text{off}}$  values obtained from the intercept of the observed association constants  $k_{\text{obs}}$ .

Values could not be estimated because (\*) the transmission spectrum was perturbed by high polarizability; (\*\*\*)  $\leq 3$  dissociation slopes available for analysis.

| DNA<br><br>Ligand | G quadruplex      | Duplex            |
|-------------------|-------------------|-------------------|
|                   | Fluorescent       | Fluorescent       |
|                   | $K_D$             | $K_D$             |
|                   | ( $\mu\text{M}$ ) | ( $\mu\text{M}$ ) |
| CV                | **                | **                |
| MB                | 0.19              | 3.09              |
| TO                | 0.63              | 1.03              |
| MG                | 3.56              | >20               |
| NS                | ***               | ***               |

Table S2. Dissociation constant  $K_D$  values calculated by fluorescence titration experiments. Values could not be estimated because (\*\*) data range did not fit a dose response curve; (\*\*\*) molecule was not fluorescent.
